# Supplementary material for: Synergistic charge-transfer dynamics of novel pyridoquinazolindone-containing triphenylamine-based push–pull chromophores: from structural optimization to performance metrics in photovoltaic solar cells and static, dynamic, solvent-dependent nonlinear optical response applications
Source: Royal Society of Chemistry journal article supplement (doi:10.1039/d4ra05290k), 2024-01-01
Supplement: d4ra05290k1.pdf [file d4ra05290k1.pdf]

## Supporting Information

### **Synergistic charge-transfer dynamics of novel pyridoquinazolindone-containing triphenylamine-based push-pull chromophores: From structural optimization to performance metrics in photovoltaic solar cells and static, dynamic, solvent-dependent nonlinear optical response applications**

Sehar Nadeem,<sup>1</sup> Abida Anwar,<sup>1</sup> Muhammad Usman Khan,\*<sup>1</sup> Abrar Ul Hassan,<sup>2</sup> Khalid Abdullah Alrashidi,<sup>3</sup>

<sup>1</sup>*Department of Chemistry, University of Okara, Okara-56300, Pakistan*

<sup>2</sup>*Lunan Research Institute, Beijing Institute of Technology, 888 Zhengtai Road, Tengzhou, 277599, China*

<sup>3</sup>*Department of Chemistry, College of Science, King Saud University, Riyadh 11451, Saudi Arabia*

#### **Corresponding author's E-mail addresses:**

- **Dr. Muhammad Usman Khan**  
E-mail ids: [usman.chemistry@gmail.com](mailto:usman.chemistry@gmail.com) ; [usmankhan@uo.edu.pk](mailto:usmankhan@uo.edu.pk)

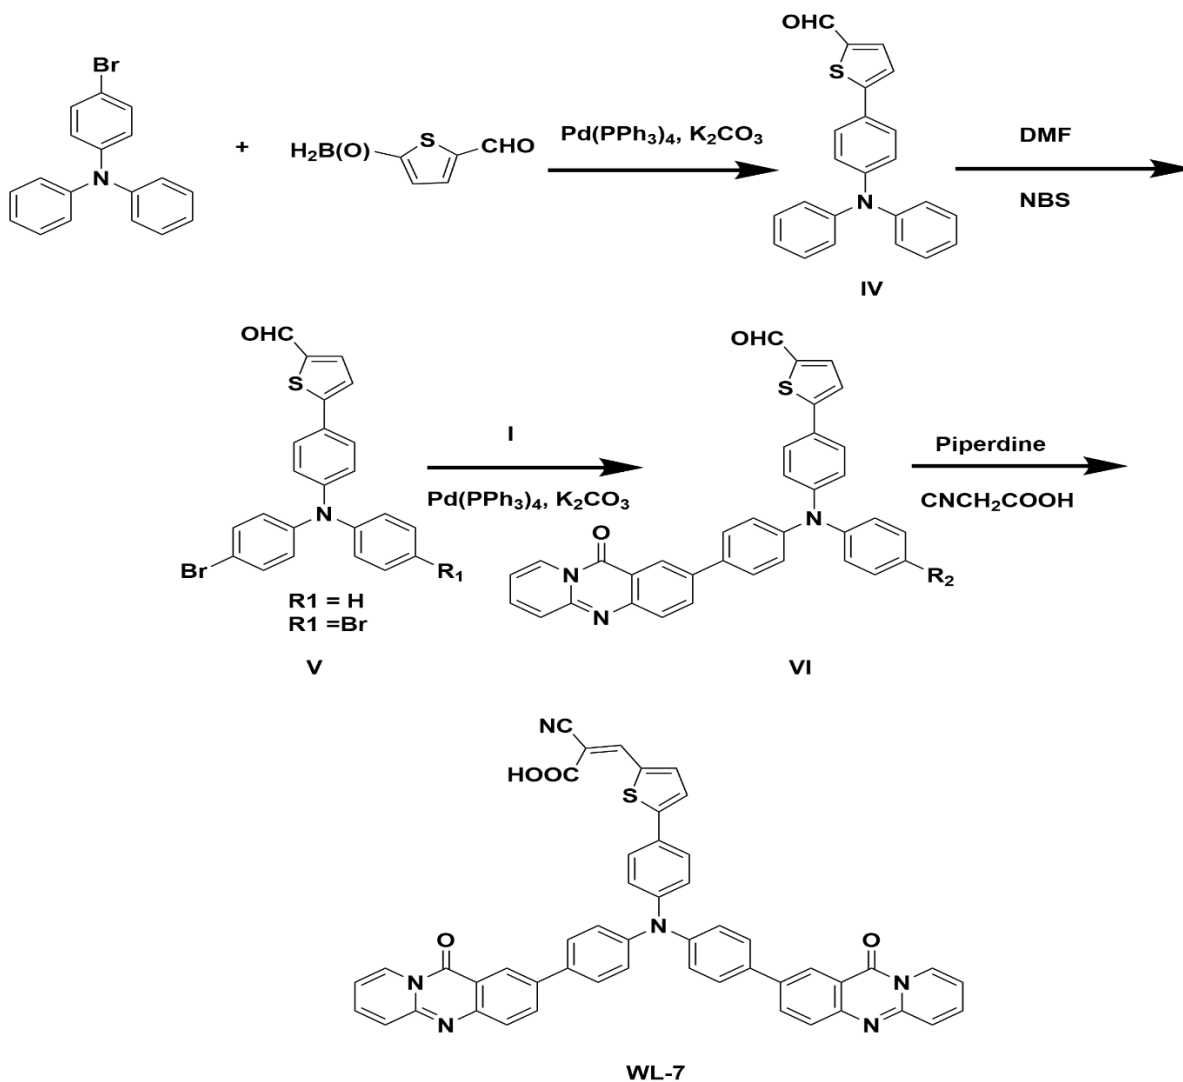

**Scheme S1.** The synthetic pathway for reference molecule given by Yang Gao et al. <sup>1</sup>

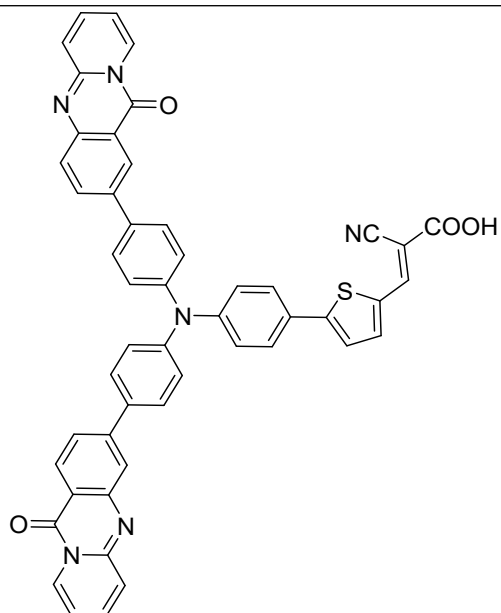

**WL-7**

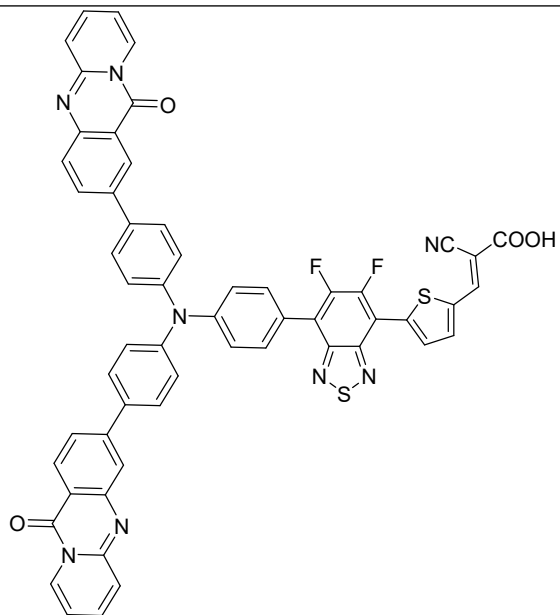

**WLK-1**

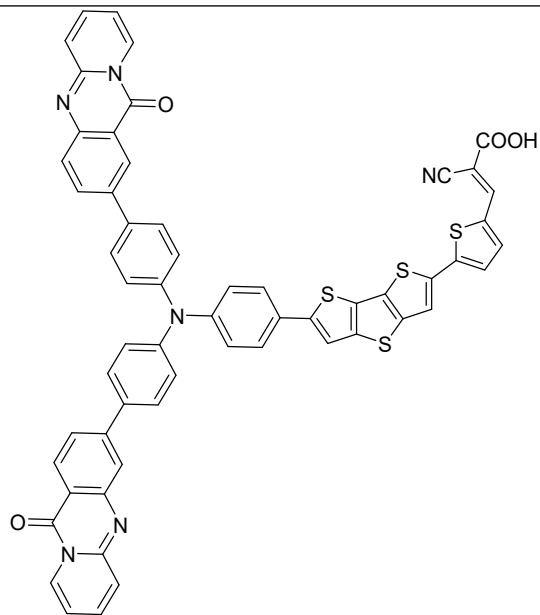

**WLK-2**

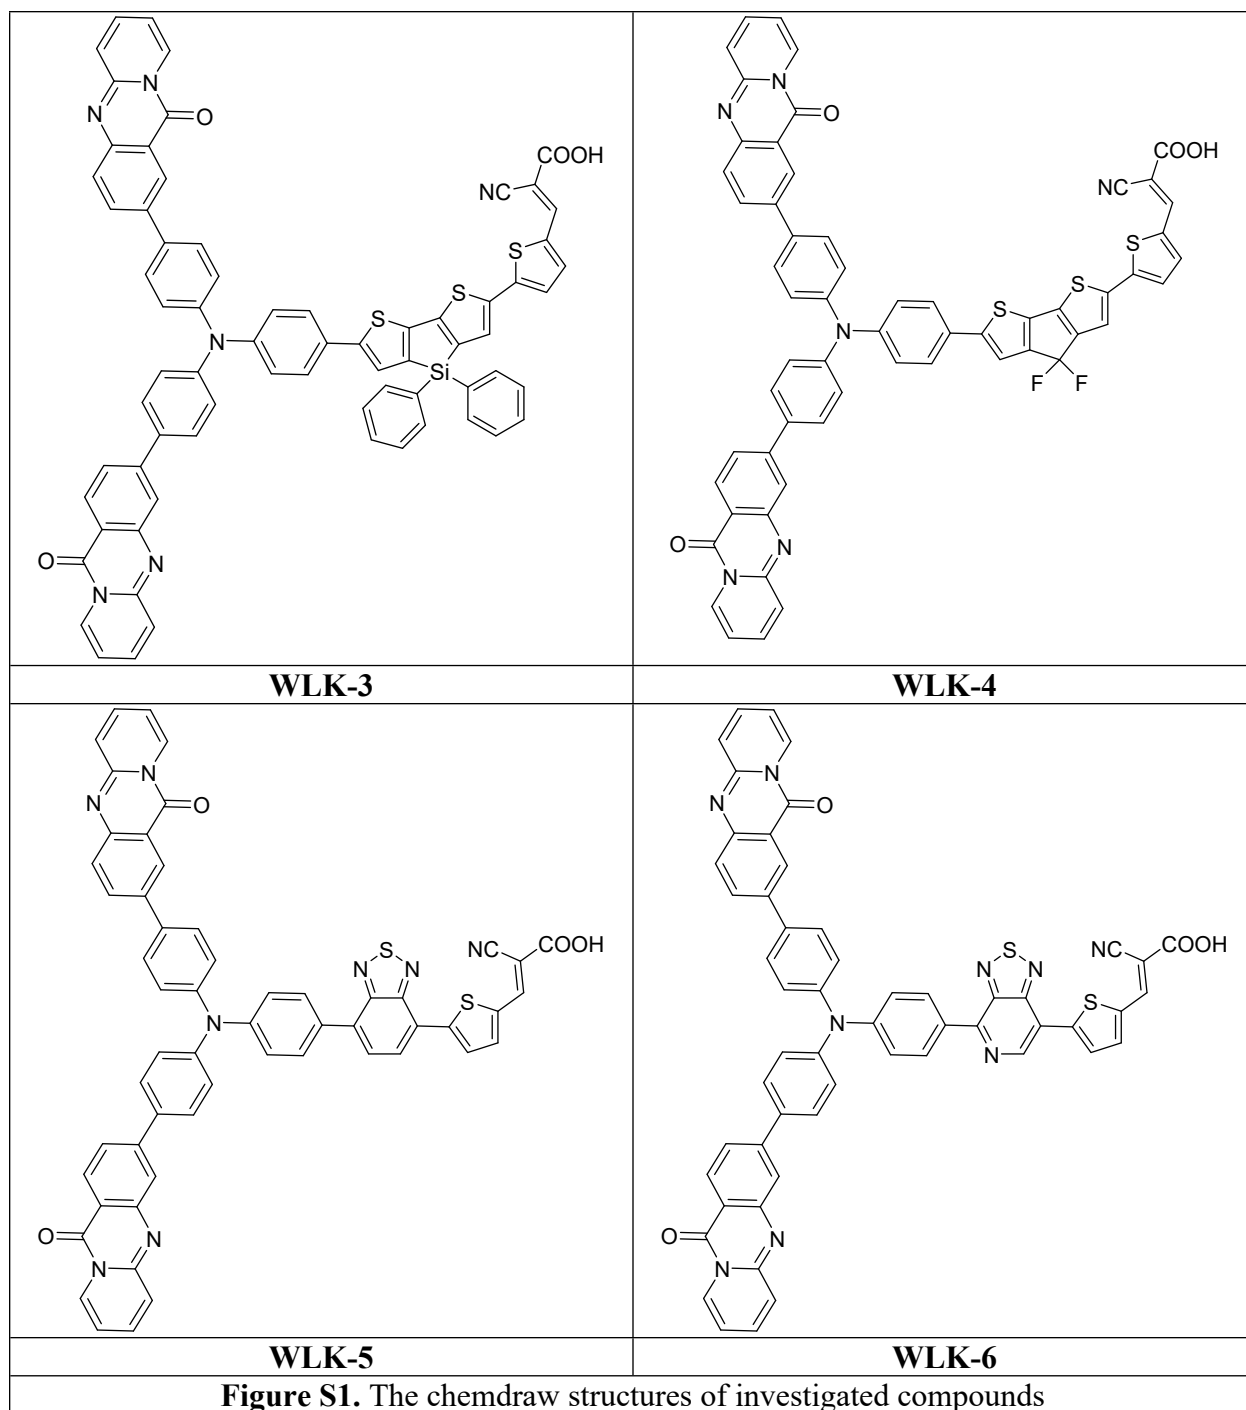

**Figure S1.** The chemdraw structures of investigated compounds

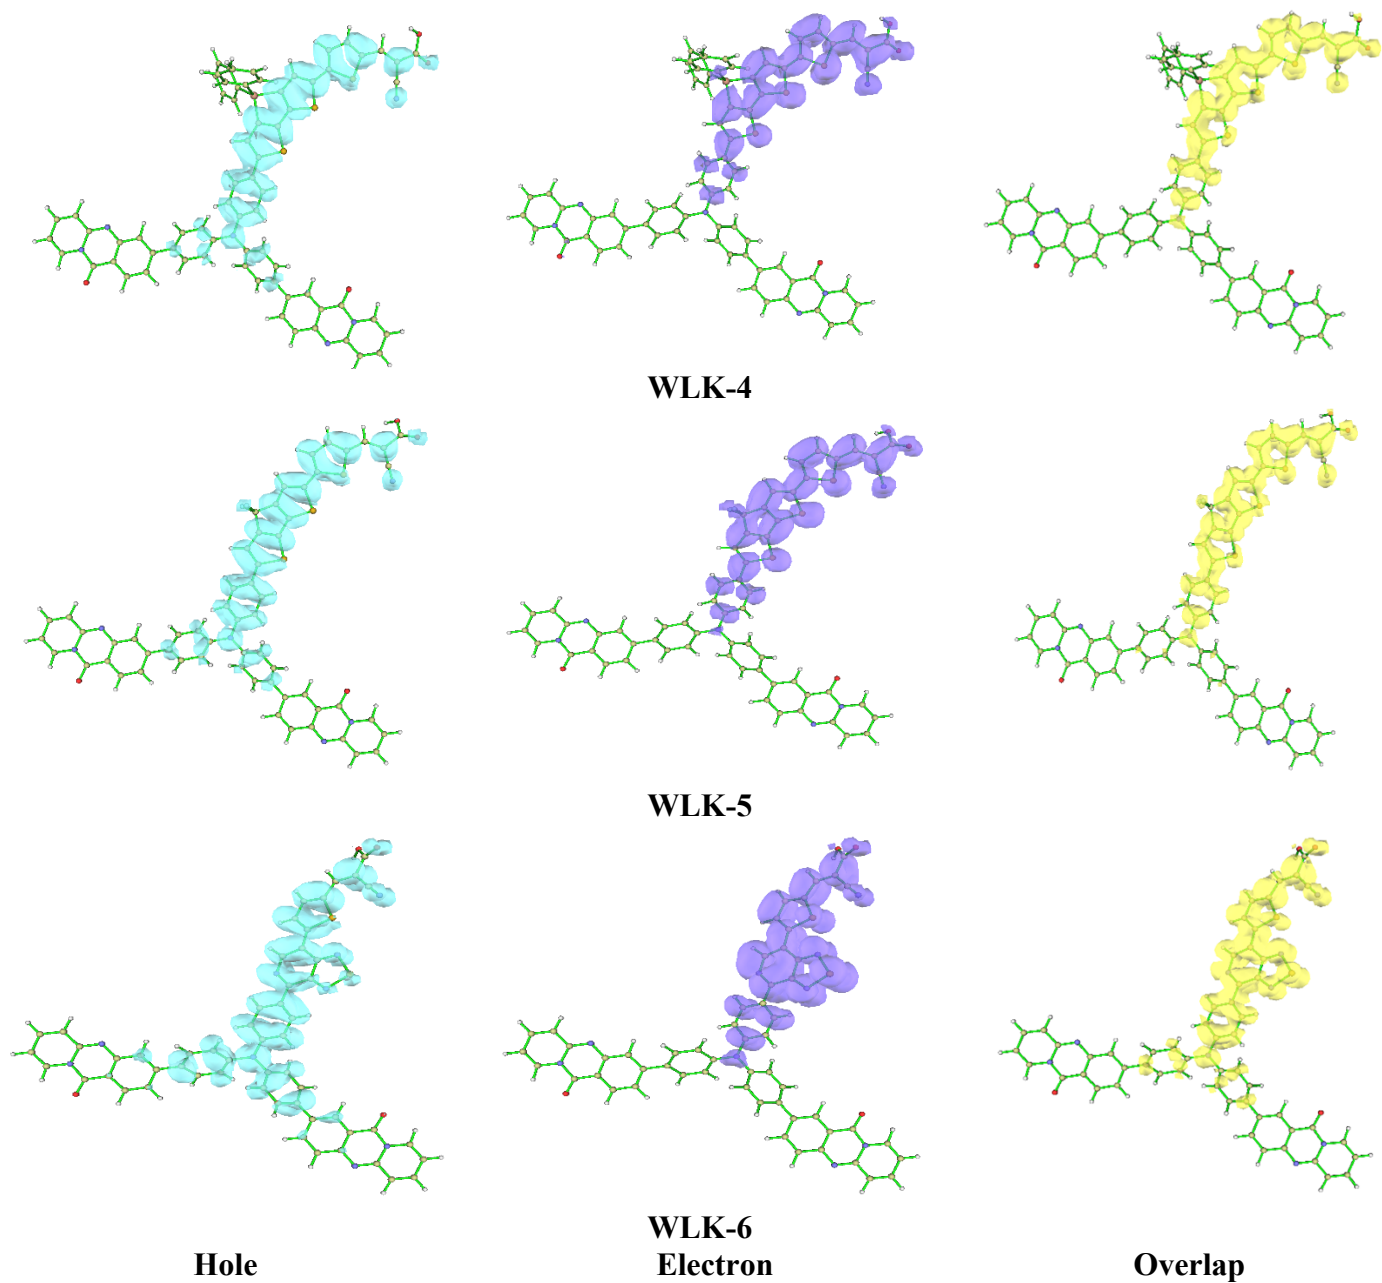

**Figure S2.** The electron-hole overlap of remaining designed molecules.

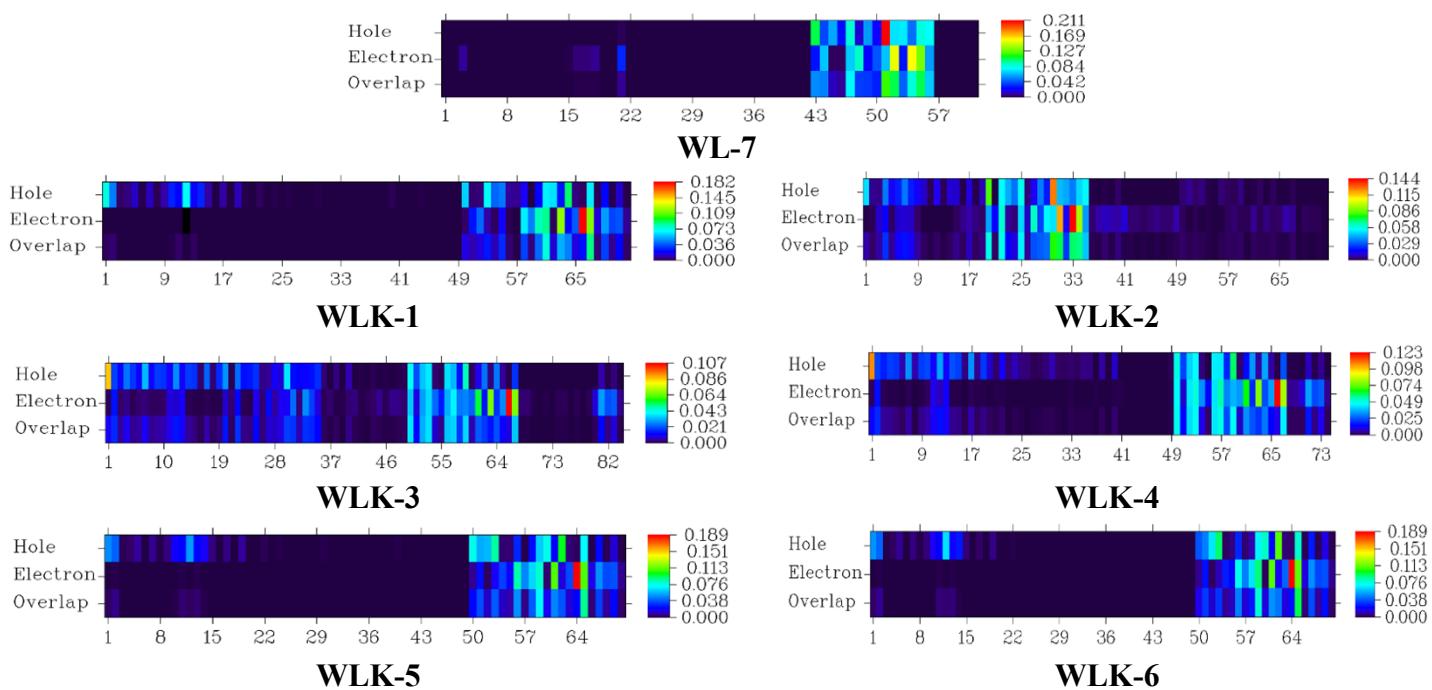

**Figure S3.** The heat maps of hole electron overlap of all designed chromophores

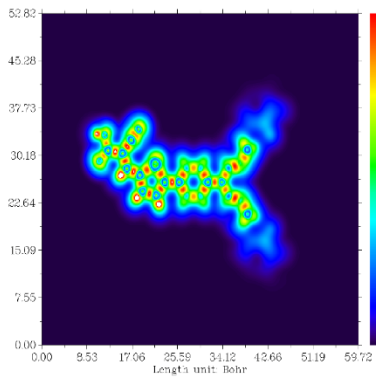

**WL-7**

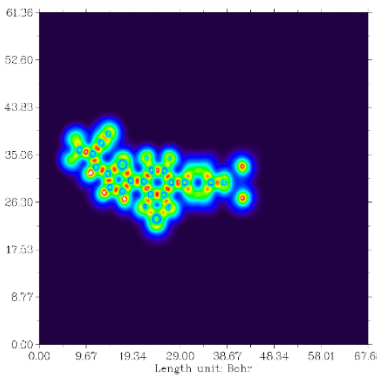

**WLK-1**

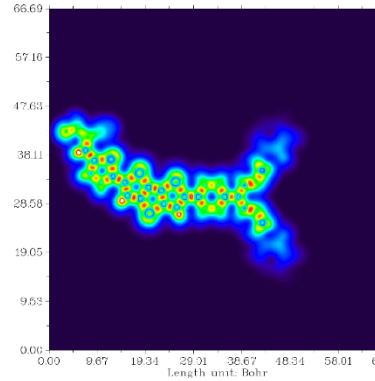

**WLK-2**

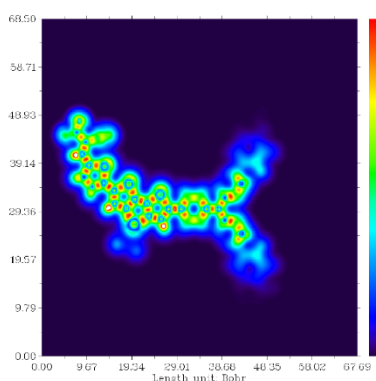

**WLK-3**

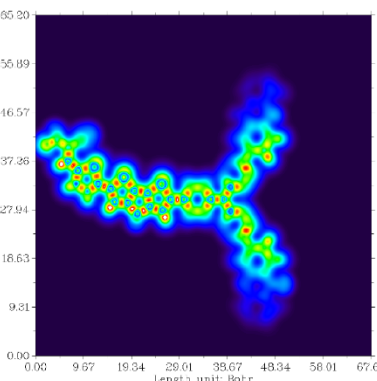

**WLK-4**

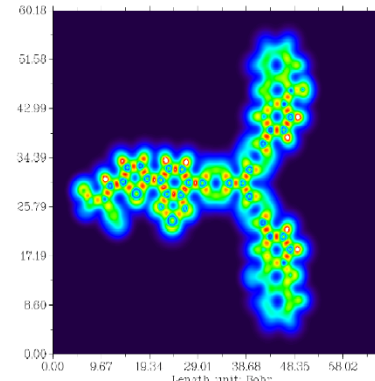

**WLK-5**

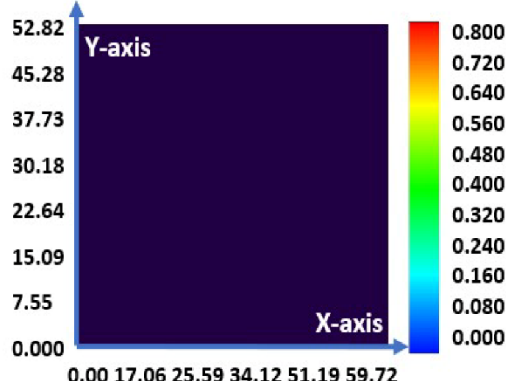

**General spectral representation of LOL**

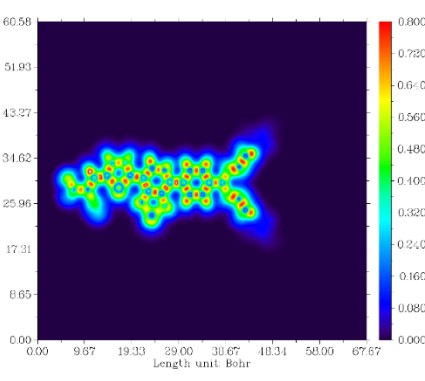

**WLK-6**

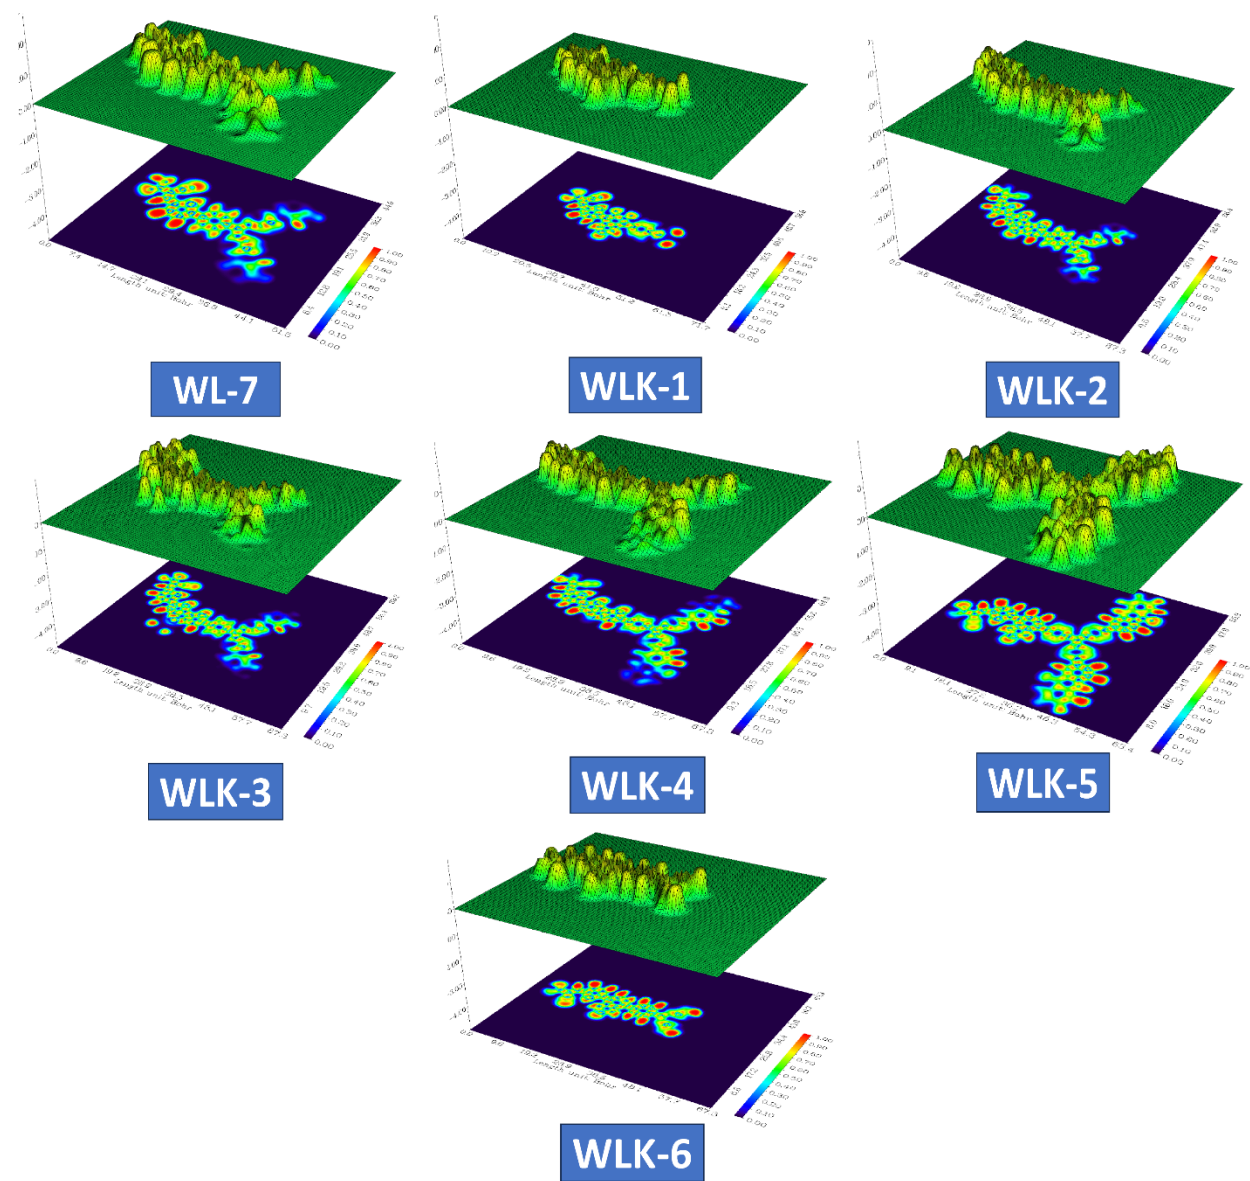

**Figure S4.** The LOL and ELF plots of all designed compounds.



**Table S1:** The FMOs,  $E_{L-H}$  and rotational velocity of all designed compounds.

| Molecules | HOMO (eV) | LUMO (eV) | Energy gap (eV) | Rotational velocity |
|-----------|-----------|-----------|-----------------|---------------------|
| WL-7      | -6.349    | -1.639    | 4.710           | -8.895              |
| WLK-1     | -6.428    | -2.546    | 3.882           | 28.937              |
| WLK-2     | -6.277    | -2.087    | 4.190           | -98.273             |
| WLK-3     | -6.145    | -1.980    | 4.166           | -64.400             |
| WLK-4     | -6.322    | -2.217    | 4.105           | -40.406             |
| WLK-5     | -6.342    | -2.321    | 4.021           | 11.444              |
| WLK-6     | -6.410    | -2.558    | 3.853           | 25.938              |

**Table S2:** The percentage contribution of different fragments in HOMO and LUMO of all designed compounds.

| Molecules | HOMO (eV) |        |                   |          | LUMO (eV) |        |                   |          |
|-----------|-----------|--------|-------------------|----------|-----------|--------|-------------------|----------|
|           | Donor     | Spacer | Additional Spacer | Acceptor | Donor     | Spacer | Additional Spacer | Acceptor |
| WL-7      | 19.8      | 72.8   | 0                 | 7.4      | 50        | 12.1   | 0                 | 37.9     |
| WLK-1     | 74.4      | 4.3    | 1.3               | 19.9     | 4.7       | 67.1   | 14.7              | 13.5     |
| WLK-2     | 68.4      | 1.8    | 16                | 13.8     | 1.4       | 34.9   | 21.1              | 42.6     |
| WLK-3     | 62.8      | 23.2   | 3                 | 11       | 1.6       | 25.1   | 33.3              | 40       |
| WLK-4     | 68.8      | 1.8    | 15.3              | 14.1     | 1.9       | 31.7   | 30.2              | 36.1     |
| WLK-5     | 73.8      | 2      | 6.6               | 17.6     | 5         | 13.4   | 58.6              | 23       |
| WLK-6     | 72.2      | 3.2    | 7.8               | 16.7     | 9.5       | 12.4   | 67.5              | 10.6     |

**Table S3:** Natural bond orbital (NBO) analysis of designed molecules at the DFT level

| Molecules | Donor (i)   | Type  | Acceptor (j) | Type    | $E^{(2)}$ | $E_j \cdot E_j$ (a.u) | $F_{i,j}$ (a.u) |
|-----------|-------------|-------|--------------|---------|-----------|-----------------------|-----------------|
| WL-7      | C 2 - C 14  | $\pi$ | C 12 - C 13  | $\pi^*$ | 35.45     | 0.36                  | 0.101           |
|           | C 3 - C 15  | $\pi$ | C 16 - C 17  | $\pi^*$ | 31.71     | 0.37                  | 0.097           |
|           | C 4 - C 9   | $\pi$ | C 7 - C 8    | $\pi^*$ | 30.64     | 0.37                  | 0.095           |
|           | C 7 - C 8   | $\pi$ | C 4 - C 9    | $\pi^*$ | 32.55     | 0.34                  | 0.095           |
|           | C 16 - C 17 | $\pi$ | C 3 - C 15   | $\pi^*$ | 31.67     | 0.34                  | 0.094           |
|           | N 1         | LP    | C 2 - C 14   | $\pi^*$ | 31.89     | 0.35                  | 0.098           |
|           | N 35        | LP    | C 38 - C 39  | $\pi^*$ | 38.67     | 0.39                  | 0.118           |

|              |             |       |             |            |        |      |       |
|--------------|-------------|-------|-------------|------------|--------|------|-------|
|              | O 42        | LP    | C 34 - N 35 | $\sigma^*$ | 34.56  | 0.72 | 0.142 |
|              | O 59        | LP    | C 57 - O 58 | $\sigma^*$ | 39.21  | 0.68 | 0.147 |
|              | C 2 - C 10  | $\pi$ | C 11 - C 12 | $\pi^*$    | 37.34  | 0.36 | 0.104 |
|              | C 7 - C 8   | $\pi$ | C 4 - C 9   | $\pi^*$    | 32.5   | 0.34 | 0.095 |
|              | C 16 - C 17 | $\pi$ | C 3 - C 15  | $\pi^*$    | 31.72  | 0.34 | 0.094 |
|              | C 13 - C 14 | $\pi$ | C 2 - C 10  | $\pi^*$    | 31.35  | 0.35 | 0.096 |
| <b>WLK-1</b> | C 11 - C 12 | $\pi$ | C 13 - C 14 | $\pi^*$    | 31.92  | 0.36 | 0.097 |
|              | N 1         | LP    | C 2 - C 10  | $\pi^*$    | 32.79  | 0.35 | 0.099 |
|              | C 23        | LP    | C 20 - C 22 | $\pi^*$    | 71.31  | 0.21 | 0.131 |
|              | C 23        | LP    | C 27 - O 35 | $\pi^*$    | 116.86 | 0.15 | 0.139 |
|              | O 35        | LP    | C 27 - N 28 | $\sigma^*$ | 34.48  | 0.72 | 0.142 |
|              | C 2 - C 14  | $\pi$ | C 12 - C 13 | $\pi^*$    | 34.1   | 0.36 | 0.099 |
|              | C 3 - C 15  | $\pi$ | C 16 - C 17 | $\pi^*$    | 31.99  | 0.37 | 0.097 |
|              | C 7 - C 8   | $\pi$ | C 4 - C 9   | $\pi^*$    | 32.27  | 0.34 | 0.095 |
|              | C 16 - C 17 | $\pi$ | C 3 - C 15  | $\pi^*$    | 31.42  | 0.34 | 0.093 |
| <b>WLK-2</b> | C 23        | LP    | C 20 - C 22 | $\pi^*$    | 71.23  | 0.21 | 0.131 |
|              | O 71        | LP    | C 70 - O 72 | $\pi^*$    | 42.53  | 0.65 | 0.15  |
|              | N 28        | LP    | C 27 - O 35 | $\pi^*$    | 57.25  | 0.35 | 0.13  |
|              | N 28        | LP    | C 29 - N 30 | $\pi^*$    | 59.51  | 0.36 | 0.133 |
|              | N 28        | LP    | C 31 - C 32 | $\pi^*$    | 38.64  | 0.39 | 0.118 |
|              | O 35        | LP    | C 27 - N 28 | $\sigma^*$ | 34.5   | 0.72 | 0.142 |
|              | C 2 - C 14  | $\pi$ | C 12 - C 13 | $\pi^*$    | 33.22  | 0.36 | 0.098 |
|              | C 3 - C 15  | $\pi$ | C 16 - C 17 | $\pi^*$    | 32.32  | 0.37 | 0.097 |
|              | C 7 - C 8   | $\pi$ | C 4 - C 9   | $\pi^*$    | 32.08  | 0.34 | 0.094 |
|              | C 63 - C 64 | $\pi$ | C 66 - C 67 | $\pi^*$    | 31.79  | 0.39 | 0.099 |
| <b>WLK-3</b> | C 72 - C 73 | $\pi$ | C 68 - C 74 | $\pi^*$    | 33.92  | 0.35 | 0.097 |
|              | C 76 - C 77 | $\pi$ | C 69 - C 75 | $\pi^*$    | 33.87  | 0.35 | 0.097 |
|              | C 23        | LP    | C 20 - C 22 | $\pi^*$    | 71.13  | 0.21 | 0.131 |
|              | N 28        | LP    | C 29 - N 30 | $\pi^*$    | 59.52  | 0.36 | 0.133 |
|              | C 38        | LP    | C 36 - C 37 | $\pi^*$    | 69.76  | 0.21 | 0.131 |
|              | N 42        | LP    | C 43 - N 44 | $\pi^*$    | 59.69  | 0.36 | 0.133 |
|              | C 2 - C 14  | $\pi$ | C 12 - C 13 | $\pi^*$    | 34.51  | 0.36 | 0.1   |
|              | C 7 - C 8   | $\pi$ | C 4 - C 9   | $\pi^*$    | 32.35  | 0.34 | 0.095 |
| <b>WLK-4</b> | C 63 - C 64 | $\pi$ | C 66 - C 67 | $\pi^*$    | 30.63  | 0.39 | 0.098 |
|              | C 18 - C 19 | $\pi$ | C 3 - C 15  | $\pi^*$    | 30.24  | 0.35 | 0.094 |
|              | C 16 - C 17 | $\pi$ | C 3 - C 15  | $\pi^*$    | 31.59  | 0.34 | 0.094 |

|       |             |       |             |         |       |      |       |
|-------|-------------|-------|-------------|---------|-------|------|-------|
| WLK-5 | N 28        | LP    | C 27 - O 35 | $\pi^*$ | 57.28 | 0.35 | 0.13  |
|       | N 28        | LP    | C 29 - N 30 | $\pi^*$ | 59.53 | 0.36 | 0.133 |
|       | C 38        | LP    | C 36 - C 37 | $\pi^*$ | 69.9  | 0.21 | 0.131 |
|       | N 42        | LP    | C 43 - N 44 | $\pi^*$ | 59.76 | 0.36 | 0.133 |
|       | C 2 - C 14  | $\pi$ | C 12 - C 13 | $\pi^*$ | 35.25 | 0.36 | 0.101 |
|       | C 3 - C 15  | $\pi$ | C 16 - C 17 | $\pi^*$ | 31.97 | 0.37 | 0.097 |
|       | C 7 - C 8   | $\pi$ | C 4 - C 9   | $\pi^*$ | 32.32 | 0.34 | 0.095 |
|       | C 12 - C 13 | $\pi$ | C 10 - C 11 | $\pi^*$ | 32.22 | 0.35 | 0.096 |
|       | C 16 - C 17 | $\pi$ | C 3 - C 15  | $\pi^*$ | 31.45 | 0.34 | 0.093 |
|       | C 23        | LP    | C 20 - C 22 | $\pi^*$ | 71.21 | 0.21 | 0.131 |
|       | N 28        | LP    | C 29 - N 30 | $\pi^*$ | 59.52 | 0.36 | 0.133 |
|       | C 38        | LP    | C 36 - C 37 | $\pi^*$ | 69.82 | 0.21 | 0.131 |
|       | N 42        | LP    | C 43 - N 44 | $\pi^*$ | 59.79 | 0.36 | 0.133 |
|       | O 70        | LP    | C 68 - O 69 | $\pi^*$ | 39.59 | 0.45 | 0.122 |
| WLK-6 | C 2 - C 14  | $\pi$ | C 12 - C 13 | $\pi^*$ | 38.08 | 0.36 | 0.105 |
|       | C 7 - C 8   | $\pi$ | C 4 - C 9   | $\pi^*$ | 32.73 | 0.34 | 0.095 |
|       | C 16 - C 17 | $\pi$ | C 3 - C 15  | $\pi^*$ | 32    | 0.34 | 0.094 |
|       | C 23 - C 24 | $\pi$ | C 27 - O 35 | $\pi^*$ | 41    | 0.32 | 0.103 |
|       | C 38 - C 39 | $\pi$ | C 41 - O 49 | $\pi^*$ | 42.03 | 0.32 | 0.105 |
|       | C 52 - C 53 | $\pi$ | C 54 - N 56 | $\pi^*$ | 32.68 | 0.34 | 0.096 |
|       | N 28        | LP    | C 27 - O 35 | $\pi^*$ | 57.27 | 0.35 | 0.13  |
|       | N 28        | LP    | C 29 - N 30 | $\pi^*$ | 59.55 | 0.36 | 0.133 |
|       | N 42        | LP    | C 41 - O 49 | $\pi^*$ | 56.73 | 0.35 | 0.129 |
|       | N 42        | LP    | C 43 - N 44 | $\pi^*$ | 59.77 | 0.36 | 0.133 |

**Table S4:** NLO response in a.u at different selected frequencies.

| Molecules        | NLO        | Frequencies        |
|------------------|------------|--------------------|
|                  | properties |                    |
| $\beta(0, 0, 0)$ |            |                    |
| WL-7             |            | $1.05 \times 10^4$ |
| WLK-1            |            | $2.23 \times 10^4$ |
| WLK-2            |            | $2.16 \times 10^4$ |
| WLK-3            |            | $2.31 \times 10^4$ |

|       |                                                                                             |                        |                         |
|-------|---------------------------------------------------------------------------------------------|------------------------|-------------------------|
| WLK-4 |                                                                                             | $2.67 \times 10^4$     |                         |
| WLK-5 |                                                                                             | $2.30 \times 10^4$     |                         |
| WLK-6 |                                                                                             | $3.75 \times 10^4$     |                         |
|       | <b><math>\beta</math> (-<math>\omega</math>, <math>\omega</math>, 0)</b>                    | <b>0.0856 (532 nm)</b> | <b>0.0428 (1064 nm)</b> |
| WL-7  |                                                                                             | $7.30 \times 10^4$     | $1.48 \times 10^4$      |
| WLK-1 |                                                                                             | $4.77 \times 10^6$     | $3.78 \times 10^4$      |
| WLK-2 |                                                                                             | $2.77 \times 10^5$     | $3.26 \times 10^4$      |
| WLK-3 |                                                                                             | $5.85 \times 10^5$     | $3.65 \times 10^4$      |
| WLK-4 |                                                                                             | $7.40 \times 10^5$     | $4.23 \times 10^4$      |
| WLK-5 |                                                                                             | $1.71 \times 10^6$     | $3.78 \times 10^4$      |
| WLK-6 |                                                                                             | $1.41 \times 10^7$     | $6.65 \times 10^4$      |
|       | <b><math>\beta</math> (-2<math>\omega</math>, <math>\omega</math>, <math>\omega</math>)</b> | <b>0.0856 (532 nm)</b> | <b>0.0428 (1064 nm)</b> |
| WL-7  |                                                                                             | $1.87 \times 10^5$     | $3.91 \times 10^4$      |
| WLK-1 |                                                                                             | $2.67 \times 10^5$     | $5.41 \times 10^5$      |
| WLK-2 |                                                                                             | $8.87 \times 10^4$     | $1.17 \times 10^5$      |
| WLK-3 |                                                                                             | $7.00 \times 10^5$     | $1.84 \times 10^5$      |
| WLK-4 |                                                                                             | $4.05 \times 10^5$     | $2.23 \times 10^5$      |
| WLK-5 |                                                                                             | $9.86 \times 10^5$     | $3.24 \times 10^5$      |
| WLK-6 |                                                                                             | $2.33 \times 10^6$     | $1.26 \times 10^6$      |

**Table S5.** Photovoltaic characteristics of investigated compounds at the DFT/CAM-B3LYP/6-31G(d,p) level in gas phase.

| Dyes  | LHE   | $E_{ox}^{dye*}$ (eV) | $\Delta G^{inject}$ (eV) | $\Delta G^{regen}$ (eV) | $V_{oc}$ (eV) |
|-------|-------|----------------------|--------------------------|-------------------------|---------------|
| WL-7  | 0.951 | 3.465                | -0.535                   | 1.499                   | 2.361         |
| WLK-1 | 0.891 | 3.961                | -0.039                   | 1.578                   | 1.454         |
| WLK-2 | 0.984 | 3.556                | -0.444                   | 1.427                   | 1.913         |
| WLK-3 | 0.975 | 3.619                | -0.381                   | 1.295                   | 2.020         |
| WLK-4 | 0.978 | 3.796                | -0.204                   | 1.472                   | 1.783         |
| WLK-5 | 0.920 | 3.917                | -0.083                   | 1.492                   | 1.679         |
| WLK-6 | 0.946 | 4.191                | 0.191                    | 1.560                   | 1.442         |



## Cartesian Coordinates of optimized geometries

### WL-7

|   |             |             |             |
|---|-------------|-------------|-------------|
| N | -0.36939700 | -0.01135400 | -0.07677300 |
| C | -0.00173700 | 1.35178200  | -0.13421400 |
| C | -1.74166400 | -0.39185800 | -0.07405800 |
| C | 0.63182100  | -1.02635300 | -0.01982700 |
| C | 1.74266100  | -0.98266400 | -0.86891800 |
| C | 2.71015700  | -1.97721600 | -0.81035200 |
| C | 2.59666800  | -3.05140500 | 0.08360700  |
| C | 1.47486200  | -3.08718300 | 0.92345700  |
| C | 0.50950800  | -2.08942700 | 0.88023700  |
| C | -0.77451400 | 2.27347200  | -0.85793100 |
| C | -0.41312300 | 3.60950700  | -0.91002700 |
| C | 0.73256800  | 4.08242800  | -0.24880700 |
| C | 1.50595600  | 3.15148100  | 0.46202500  |
| C | 1.14699100  | 1.81445200  | 0.52456700  |
| C | -2.17734500 | -1.47384300 | -0.84674800 |
| C | -3.51215600 | -1.85671800 | -0.83010900 |
| C | -4.45705300 | -1.16683200 | -0.05844700 |
| C | -4.00987300 | -0.08197900 | 0.70840200  |
| C | -2.67423200 | 0.29713500  | 0.71019600  |
| C | 3.62964800  | -4.11166100 | 0.13922600  |
| C | -5.88301700 | -1.56972400 | -0.05369000 |
| C | 1.09196600  | 5.49363700  | -0.30899100 |
| C | 0.29293900  | 6.56577500  | -0.62923300 |
| C | 0.95869800  | 7.81128900  | -0.59609000 |
| C | 2.29000900  | 7.74566300  | -0.24523400 |
| S | 2.76539300  | 6.03048700  | 0.05481400  |

|   |              |             |             |
|---|--------------|-------------|-------------|
| C | 3.14807700   | 8.87585800  | -0.14004000 |
| C | 4.46103100   | 8.97220100  | 0.20386500  |
| C | 4.97007200   | -3.82135400 | -0.06263100 |
| C | 5.94211200   | -4.83255600 | -0.01052300 |
| C | 5.57567200   | -6.16747200 | 0.25500700  |
| C | 4.21281900   | -6.45956200 | 0.46001900  |
| C | 3.27018200   | -5.45878400 | 0.40134700  |
| C | 7.33210000   | -4.49638900 | -0.22347400 |
| N | 8.23231700   | -5.60362800 | -0.13936900 |
| C | 7.76776700   | -6.90638600 | 0.12839900  |
| N | 6.50014300   | -7.18845700 | 0.31821100  |
| C | 9.58507200   | -5.34039200 | -0.33392400 |
| C | 10.50322900  | -6.32973100 | -0.27307900 |
| C | 10.07778800  | -7.67138100 | -0.00425200 |
| C | 8.76186700   | -7.94005700 | 0.18735000  |
| O | 7.77582000   | -3.36060100 | -0.46506300 |
| C | -6.24026000  | -2.93989000 | -0.14382700 |
| C | -7.56162500  | -3.32439100 | -0.14040800 |
| C | -8.57946400  | -2.35921000 | -0.04461500 |
| C | -8.24412700  | -0.99298800 | 0.04905500  |
| C | -6.88874400  | -0.61957900 | 0.04002200  |
| C | -9.96352400  | -2.76780100 | -0.03998100 |
| N | -10.90093600 | -1.69139600 | 0.06067200  |
| C | -10.47040000 | -0.35298200 | 0.14607400  |
| N | -9.20526000  | -0.00559600 | 0.14122500  |
| C | -12.25211800 | -2.02258200 | 0.06936400  |
| C | -13.20355100 | -1.06743500 | 0.16025200  |
| C | -12.81413800 | 0.30867500  | 0.24889200  |

|   |              |             |             |
|---|--------------|-------------|-------------|
| C | -11.49960300 | 0.64371800  | 0.24140900  |
| O | -10.37859700 | -3.93760000 | -0.11437000 |
| C | 5.05176100   | 10.31939600 | 0.21205200  |
| O | 6.36723700   | 10.31579800 | 0.56891500  |
| O | 4.44967600   | 11.35954600 | -0.06826900 |
| C | 5.28047100   | 7.86281000  | 0.55203700  |
| N | 5.94150800   | 6.94333300  | 0.83684600  |
| H | 1.83946700   | -0.17219000 | -1.58121300 |
| H | 3.55080600   | -1.93730200 | -1.49347000 |
| H | 1.37257300   | -3.88730100 | 1.64776000  |
| H | -0.34032900  | -2.12463700 | 1.55111300  |
| H | -1.65210700  | 1.93207400  | -1.39174500 |
| H | -1.01225100  | 4.29171600  | -1.50157200 |
| H | 2.38814100   | 3.48173500  | 0.99892800  |
| H | 1.75229800   | 1.12172900  | 1.09480900  |
| H | -1.46608600  | -2.00701100 | -1.46557800 |
| H | -3.83119800  | -2.68274600 | -1.45534900 |
| H | -4.71154400  | 0.44934400  | 1.34108400  |
| H | -2.34519400  | 1.12297400  | 1.32909400  |
| H | -0.75861500  | 6.46523700  | -0.85870300 |
| H | 0.47272100   | 8.75409700  | -0.81487000 |
| H | 2.67626900   | 9.82822500  | -0.37431200 |
| H | 5.30558400   | -2.80710000 | -0.24283900 |
| H | 3.94204100   | -7.48975300 | 0.65224900  |
| H | 2.22338300   | -5.70634000 | 0.53630000  |
| H | 9.80083700   | -4.30058800 | -0.52966900 |
| H | 11.54888900  | -6.10200900 | -0.42708400 |
| H | 10.81236700  | -8.46589000 | 0.04469800  |



|   |              |             |             |
|---|--------------|-------------|-------------|
| H | 8.38636500   | -8.93237100 | 0.39332300  |
| H | -5.46034500  | -3.69017700 | -0.18879100 |
| H | -7.84744400  | -4.36751200 | -0.20054400 |
| H | -6.66704400  | 0.43891200  | 0.08366900  |
| H | -12.43856200 | -3.08383300 | -0.00194500 |
| H | -14.24773400 | -1.34781300 | 0.16533300  |
| H | -13.57495100 | 1.07626900  | 0.32162700  |
| H | -11.15087400 | 1.66466700  | 0.30574900  |
| H | 6.73131800   | 11.22340800 | 0.56493100  |

### **WLK-1**

|   |             |             |             |
|---|-------------|-------------|-------------|
| N | -2.08083400 | 0.24992400  | 0.05020700  |
| C | -0.69500900 | 0.00327400  | 0.16766000  |
| C | -3.00922900 | -0.82944300 | 0.00238900  |
| C | -2.57161900 | 1.58780100  | -0.02179400 |
| C | -2.10426800 | 2.56784000  | 0.86020000  |
| C | -2.58868700 | 3.86715500  | 0.78602900  |
| C | -3.56122700 | 4.22849200  | -0.15713500 |
| C | -4.02839700 | 3.23462200  | -1.02832300 |
| C | -3.53928900 | 1.93583100  | -0.96910800 |
| C | -0.21932300 | -1.09809300 | 0.89422000  |
| C | 1.14096000  | -1.33630400 | 1.01048000  |
| C | 2.08229700  | -0.48785600 | 0.40572600  |
| C | 1.59804100  | 0.61453500  | -0.31888400 |
| C | 0.23924100  | 0.85794600  | -0.43587900 |
| C | -4.20201300 | -0.76869800 | 0.73074200  |
| C | -5.11670200 | -1.81190900 | 0.66887200  |

|   |             |             |             |
|---|-------------|-------------|-------------|
| C | -4.86673400 | -2.95294700 | -0.10550300 |
| C | -3.66657500 | -3.00424100 | -0.82801500 |
| C | -2.75430300 | -1.95852400 | -0.78448200 |
| C | -4.07442100 | 5.61607300  | -0.23106500 |
| C | -5.83866400 | -4.07029900 | -0.15832000 |
| C | -3.24894900 | 6.70165000  | 0.01732800  |
| C | -3.74287300 | 8.01361800  | -0.05249300 |
| C | -5.09141800 | 8.25590700  | -0.38353400 |
| C | -5.92801900 | 7.15080900  | -0.63597200 |
| C | -5.43104200 | 5.86989800  | -0.55948500 |
| C | -2.85520100 | 9.12417400  | 0.20977200  |
| N | -3.46504300 | 10.41228500 | 0.10250400  |
| C | -4.82654200 | 10.55239800 | -0.23174100 |
| N | -5.61411700 | 9.52903100  | -0.46583900 |
| C | -2.65837500 | 11.52085600 | 0.34268500  |
| C | -3.15558700 | 12.77463700 | 0.26389500  |
| C | -4.53532700 | 12.96667700 | -0.07204600 |
| C | -5.33130500 | 11.89385500 | -0.30855800 |
| O | -1.65177100 | 9.03681400  | 0.50997000  |
| C | -7.23268800 | -3.80936400 | -0.11688100 |
| C | -8.14338800 | -4.83999400 | -0.16469900 |
| C | -7.70138400 | -6.17138400 | -0.25836500 |
| C | -6.32014100 | -6.45036800 | -0.30432700 |
| C | -5.40515000 | -5.38431400 | -0.25009000 |
| C | -8.66049400 | -7.24846600 | -0.30966300 |
| N | -8.08348300 | -8.55448200 | -0.40361600 |
| C | -6.68708200 | -8.73557400 | -0.43997200 |
| N | -5.83401200 | -7.73994800 | -0.39273200 |

|   |             |              |             |
|---|-------------|--------------|-------------|
| C | -8.95845400 | -9.63480800  | -0.45641600 |
| C | -8.49734300 | -10.90183500 | -0.54470100 |
| C | -7.08428700 | -11.13615800 | -0.58434700 |
| C | -6.22139800 | -10.09062300 | -0.53352400 |
| O | -9.89748700 | -7.12523600  | -0.27888900 |
| C | 3.52813300  | -0.74348400  | 0.51625900  |
| C | 4.14170200  | -1.30359700  | 1.70447300  |
| C | 5.58901700  | -1.53380300  | 1.79602000  |
| C | 6.47203800  | -1.21391800  | 0.68899400  |
| C | 5.82202900  | -0.69366500  | -0.39345000 |
| C | 4.41705300  | -0.47006500  | -0.47906400 |
| F | 3.99787700  | 0.04304700   | -1.68479100 |
| F | 6.52226600  | -0.34851000  | -1.52222800 |
| N | 3.45975200  | -1.62936100  | 2.78622400  |
| S | 4.58961300  | -2.24407700  | 3.97768700  |
| N | 5.99672000  | -2.03616100  | 2.94570600  |
| C | 7.90809900  | -1.43077600  | 0.74513200  |
| C | 8.63427100  | -1.94125300  | 1.79710100  |
| C | 10.02068200 | -2.03279100  | 1.54711800  |
| C | 10.41065000 | -1.59713100  | 0.30121900  |
| S | 8.99209600  | -1.03033300  | -0.64314300 |
| C | 11.76524500 | -1.61076900  | -0.16058200 |
| C | 12.30954300 | -1.19278900  | -1.33261500 |
| C | 11.55921800 | -0.57945200  | -2.37636400 |
| N | 10.95177600 | -0.08320800  | -3.24055700 |
| C | 13.78097200 | -1.26482300  | -1.56285500 |
| O | 14.39169700 | -0.49753600  | -2.28745500 |
| O | 14.45929700 | -2.25198300  | -0.87814600 |

|   |             |              |             |
|---|-------------|--------------|-------------|
| H | -1.36775600 | 2.30417400   | 1.60964700  |
| H | -2.23114300 | 4.60595000   | 1.49409100  |
| H | -4.75821000 | 3.48799400   | -1.78889500 |
| H | -3.89815700 | 1.18641400   | -1.66418100 |
| H | -0.92215900 | -1.76495400  | 1.37655700  |
| H | 1.47685800  | -2.17956100  | 1.59643600  |
| H | 2.29159200  | 1.28795100   | -0.80313500 |
| H | -0.10463500 | 1.71302200   | -1.00314300 |
| H | -4.40382100 | 0.09594400   | 1.35109500  |
| H | -6.02299300 | -1.75399700  | 1.26073000  |
| H | -3.46156700 | -3.85916200  | -1.46201100 |
| H | -1.84384000 | -2.00740100  | -1.36926500 |
| H | -2.19898200 | 6.56890200   | 0.24888300  |
| H | -6.96409200 | 7.34873200   | -0.87872700 |
| H | -6.09547100 | 5.03085600   | -0.73217100 |
| H | -1.63721600 | 11.26931100  | 0.58749800  |
| H | -2.51033100 | 13.62106600  | 0.45415000  |
| H | -4.93571200 | 13.97110400  | -0.13555000 |
| H | -6.37742700 | 11.98086800  | -0.56578800 |
| H | -7.58007200 | -2.78432500  | -0.07397600 |
| H | -9.21025500 | -4.65375400  | -0.14187900 |
| H | -4.35234700 | -5.63531800  | -0.25759100 |
| H | -9.99976100 | -9.35116500  | -0.42008700 |
| H | -9.19566300 | -11.72628100 | -0.58467800 |
| H | -6.71213200 | -12.15096500 | -0.65502300 |
| H | -5.14759700 | -10.21035900 | -0.56007400 |
| H | 8.16485400  | -2.23812500  | 2.72115200  |
| H | 10.72782800 | -2.41253100  | 2.27421100  |

|   |             |             |             |
|---|-------------|-------------|-------------|
| H | 12.45935400 | -1.99829100 | 0.58223800  |
| H | 13.89530400 | -2.99060400 | -0.58354200 |

### WLK-2

|   |             |             |             |
|---|-------------|-------------|-------------|
| N | 3.07519200  | 0.40613600  | -0.07927000 |
| C | 1.78971000  | -0.18124000 | -0.16931900 |
| C | 4.23913200  | -0.41076700 | -0.03299000 |
| C | 3.21255300  | 1.82434300  | -0.03303300 |
| C | 2.47452900  | 2.64136100  | -0.89645200 |
| C | 2.61163500  | 4.02223200  | -0.84517500 |
| C | 3.49524700  | 4.63331700  | 0.05570100  |
| C | 4.23542600  | 3.80337300  | 0.90913100  |
| C | 4.09418500  | 2.42204400  | 0.87350000  |
| C | 1.58420800  | -1.34307300 | -0.92769700 |
| C | 0.32460700  | -1.91477000 | -1.01483700 |
| C | -0.77816500 | -1.35249900 | -0.35201100 |
| C | -0.56561600 | -0.18436000 | 0.39473200  |
| C | 0.69302600  | 0.39015700  | 0.49020200  |
| C | 5.38392800  | -0.05620200 | -0.75581000 |
| C | 6.52450300  | -0.84617600 | -0.69807800 |
| C | 6.55825800  | -2.02099900 | 0.06543900  |
| C | 5.40448300  | -2.36891100 | 0.78141300  |
| C | 4.26540500  | -1.57620700 | 0.74248500  |
| C | 3.63785500  | 6.10681600  | 0.10526100  |
| C | 7.77240600  | -2.86885200 | 0.11314800  |
| C | 2.55278300  | 6.94182400  | -0.11186200 |
| C | 2.69638800  | 8.33729200  | -0.06536900 |
| C | 3.94956100  | 8.92093600  | 0.20984900  |

|   |             |             |             |
|---|-------------|-------------|-------------|
| C | 5.05048200  | 8.07009100  | 0.43068500  |
| C | 4.89574400  | 6.70375600  | 0.37749100  |
| C | 1.54421700  | 9.18024500  | -0.29365500 |
| N | 1.80737300  | 10.58287400 | -0.21469800 |
| C | 3.09945200  | 11.07106200 | 0.06323500  |
| N | 4.13139700  | 10.28647800 | 0.26763500  |
| C | 0.73485000  | 11.44482000 | -0.42453000 |
| C | 0.89680100  | 12.78502200 | -0.36940100 |
| C | 2.19325600  | 13.32812900 | -0.09068400 |
| C | 3.24615100  | 12.49794700 | 0.11585600  |
| O | 0.39258800  | 8.78406500  | -0.54390600 |
| C | 9.06135500  | -2.27666200 | 0.07820000  |
| C | 10.19527700 | -3.05522600 | 0.12124000  |
| C | 10.09028300 | -4.45487500 | 0.20351700  |
| C | 8.81818800  | -5.06159000 | 0.24294300  |
| C | 7.67157300  | -4.24966800 | 0.19373100  |
| C | 11.28238500 | -5.26673400 | 0.24962200  |
| N | 11.04016700 | -6.67466500 | 0.33122000  |
| C | 9.72963700  | -7.19013100 | 0.36172000  |
| N | 8.66016300  | -6.43148800 | 0.31980900  |
| C | 12.15149200 | -7.51023800 | 0.37788900  |
| C | 12.01227900 | -8.85208200 | 0.45440300  |
| C | 10.69855600 | -9.42329000 | 0.48783000  |
| C | 9.60739900  | -8.61854800 | 0.44288800  |
| O | 12.45241400 | -4.84629700 | 0.22404600  |
| C | -2.09370500 | -1.97761300 | -0.44557100 |
| C | -2.40070400 | -3.28428000 | -0.70689900 |
| C | -3.79958800 | -3.53073100 | -0.73134900 |

|   |              |             |             |
|---|--------------|-------------|-------------|
| C | -4.59370400  | -2.43057100 | -0.48471300 |
| S | -3.59821400  | -0.97389000 | -0.21337200 |
| S | -4.77368200  | -5.02812700 | -1.00622200 |
| C | -6.26917200  | -4.04151500 | -0.76554900 |
| C | -5.97861900  | -2.71657500 | -0.50294600 |
| C | -7.64823800  | -4.36074300 | -0.78280800 |
| C | -8.44911500  | -3.27424500 | -0.53977000 |
| S | -7.46703800  | -1.76477400 | -0.26581000 |
| C | -9.88574900  | -3.24068800 | -0.49957200 |
| C | -10.76082400 | -4.16680600 | -1.02004200 |
| C | -12.11938400 | -3.85383600 | -0.79824600 |
| C | -12.33806700 | -2.67824400 | -0.11268600 |
| S | -10.76562900 | -1.90408400 | 0.31287600  |
| C | -13.63076700 | -2.15774500 | 0.19804900  |
| C | -14.00065800 | -1.04136400 | 0.88000700  |
| C | -13.07114900 | -0.14853600 | 1.48537400  |
| N | -12.31134200 | 0.58949300  | 1.97583100  |
| C | -15.43708600 | -0.73198000 | 1.12394100  |
| O | -15.84219100 | -0.10382100 | 2.08756500  |
| O | -16.33447900 | -1.22543800 | 0.19811000  |
| H | 1.80077600   | 2.18893800  | -1.61399300 |
| H | 2.04813900   | 4.63522400  | -1.53927700 |
| H | 4.90472500   | 4.24499800  | 1.63879400  |
| H | 4.66003800   | 1.79955300  | 1.55597100  |
| H | 2.41526100   | -1.78575800 | -1.46203700 |
| H | 0.18583400   | -2.79259800 | -1.63528600 |
| H | -1.39060200  | 0.26640100  | 0.93507000  |
| H | 0.83382900   | 1.28240300  | 1.08685100  |

|   |              |              |             |
|---|--------------|--------------|-------------|
| H | 5.37157700   | 0.83640000   | -1.36910700 |
| H | 7.39057500   | -0.56415300  | -1.28586500 |
| H | 5.41158700   | -3.25397100  | 1.40719300  |
| H | 3.39315600   | -1.85111500  | 1.32281700  |
| H | 1.56373800   | 6.54181200   | -0.30016900 |
| H | 6.00987900   | 8.52966600   | 0.63049300  |
| H | 5.75919300   | 6.06497800   | 0.52483200  |
| H | -0.19646300  | 10.93709400  | -0.62671200 |
| H | 0.04927200   | 13.43553200  | -0.53530100 |
| H | 2.32503300   | 14.40232200  | -0.04624600 |
| H | 4.24423100   | 12.85315600  | 0.32982100  |
| H | 9.14910700   | -1.19761200  | 0.04404200  |
| H | 11.18483500  | -2.61492200  | 0.10320600  |
| H | 6.71141600   | -4.74920400  | 0.19579600  |
| H | 13.09258800  | -6.98157200  | 0.34701200  |
| H | 12.89008400  | -9.48229800  | 0.48972300  |
| H | 10.58426800  | -10.49871100 | 0.54905700  |
| H | 8.59491800   | -8.99601700  | 0.46510100  |
| H | -1.64821300  | -4.04737600  | -0.84694300 |
| H | -8.04109400  | -5.35511100  | -0.94406900 |
| H | -10.43218300 | -5.03771200  | -1.56980700 |
| H | -12.93577200 | -4.47496600  | -1.14586500 |
| H | -14.43787700 | -2.79672400  | -0.15412300 |
| H | -15.93952600 | -1.42168600  | -0.67133000 |

### WLK-3

|   |            |            |             |
|---|------------|------------|-------------|
| N | 3.74738200 | 0.93697100 | -0.03022500 |
| C | 2.43052300 | 0.41067800 | 0.00229000  |



|   |             |             |             |
|---|-------------|-------------|-------------|
| C | 4.86829900  | 0.06356800  | -0.06771600 |
| C | 3.95181600  | 2.34696000  | -0.02529800 |
| C | 3.20928400  | 3.17254700  | 0.82634900  |
| C | 3.41014300  | 4.54650100  | 0.82430400  |
| C | 4.36326100  | 5.14221200  | -0.01376400 |
| C | 5.10618000  | 4.30381300  | -0.85647500 |
| C | 4.90195200  | 2.93008300  | -0.87054900 |
| C | 2.13808300  | -0.74050600 | 0.74685700  |
| C | 0.84997500  | -1.25217300 | 0.77769800  |
| C | -0.19601100 | -0.63707900 | 0.07060900  |
| C | 0.10465500  | 0.52102300  | -0.66184800 |
| C | 1.39257900  | 1.03484400  | -0.70148000 |
| C | 6.01507200  | 0.34495300  | 0.68440300  |
| C | 7.11366200  | -0.50280700 | 0.63598300  |
| C | 7.10259600  | -1.66532000 | -0.14687500 |
| C | 5.94720200  | -1.94039700 | -0.89134000 |
| C | 4.85049700  | -1.08986500 | -0.86174300 |
| C | 4.57415600  | 6.60827400  | -0.01052600 |
| C | 8.27168700  | -2.57443800 | -0.18510200 |
| C | 3.51869800  | 7.48633100  | 0.18179400  |
| C | 3.72723700  | 8.87434300  | 0.18593000  |
| C | 5.01717200  | 9.40689600  | -0.01218000 |
| C | 6.08784700  | 8.51255000  | -0.20801800 |
| C | 5.86924300  | 7.15388000  | -0.20484900 |
| C | 2.60460300  | 9.76298900  | 0.38667900  |
| N | 2.93425100  | 11.15365700 | 0.36414900  |
| C | 4.25885600  | 11.58912500 | 0.16205600  |
| N | 5.26297900  | 10.76374900 | -0.01861700 |

|    |             |             |             |
|----|-------------|-------------|-------------|
| C  | 1.89279500  | 12.05794500 | 0.55082000  |
| C  | 2.11730600  | 13.39023500 | 0.54533500  |
| C  | 3.44877600  | 13.88041700 | 0.34437600  |
| C  | 4.47192700  | 13.00863700 | 0.16109800  |
| O  | 1.42563900  | 9.41382300  | 0.57032700  |
| C  | 9.58864000  | -2.05127800 | -0.11131500 |
| C  | 10.68148500 | -2.88688400 | -0.14538500 |
| C  | 10.50623400 | -4.27743600 | -0.25728500 |
| C  | 9.20552200  | -4.81600600 | -0.33559900 |
| C  | 8.10168200  | -3.94659700 | -0.29474300 |
| C  | 11.65542800 | -5.14921000 | -0.29402400 |
| N  | 11.34264600 | -6.54093900 | -0.40819200 |
| C  | 10.00814700 | -6.98671400 | -0.47660300 |
| N  | 8.97872900  | -6.17439600 | -0.44265600 |
| C  | 12.41001400 | -7.43225800 | -0.44754400 |
| C  | 12.20347800 | -8.76340200 | -0.55320900 |
| C  | 10.86301400 | -9.26470900 | -0.62569600 |
| C  | 9.81420000  | -8.40520900 | -0.58824100 |
| O  | 12.84490400 | -4.79106400 | -0.23558200 |
| C  | -1.54234000 | -1.20066500 | 0.10660300  |
| C  | -1.92975600 | -2.48985900 | 0.36773100  |
| C  | -3.33703200 | -2.70678900 | 0.33217800  |
| C  | -4.04539000 | -1.56314200 | 0.03500600  |
| S  | -2.98758900 | -0.15036500 | -0.20724300 |
| Si | -4.58657500 | -4.13369000 | 0.56847200  |
| C  | -6.02610000 | -2.92639000 | 0.20936800  |
| C  | -5.48170200 | -1.68034600 | -0.03395800 |
| C  | -7.44136700 | -2.93211300 | 0.11517900  |

|   |              |             |             |
|---|--------------|-------------|-------------|
| C | -7.99935500  | -1.71394200 | -0.19923400 |
| S | -6.71382600  | -0.45051100 | -0.39645300 |
| C | -9.39009500  | -1.40281400 | -0.37292600 |
| C | -10.44010800 | -2.28762300 | -0.49320700 |
| C | -11.69677300 | -1.66475600 | -0.63795600 |
| C | -11.66503400 | -0.28578300 | -0.64360800 |
| S | -9.96794100  | 0.29517900  | -0.44713000 |
| C | -12.81643500 | 0.54368900  | -0.78065200 |
| C | -12.93994500 | 1.89762800  | -0.83642300 |
| C | -4.67741200  | -4.84498100 | 2.32097800  |
| C | -4.35789400  | -5.50420600 | -0.71769300 |
| C | -3.92302800  | -5.97232400 | 2.67956700  |
| C | -3.95530300  | -6.46829300 | 3.98168200  |
| C | -4.74503900  | -5.84441800 | 4.94603300  |
| C | -5.50193600  | -4.72460700 | 4.60523400  |
| C | -5.46777300  | -4.22963600 | 3.30303600  |
| C | -3.59053500  | -5.28195900 | -1.87065100 |
| C | -3.45466200  | -6.27443200 | -2.83960600 |
| C | -4.08499600  | -7.50595300 | -2.67027900 |
| C | -4.84977700  | -7.74350000 | -1.52923900 |
| C | -4.98359800  | -6.75035700 | -0.56076600 |
| C | -11.82874000 | 2.78715400  | -0.80544100 |
| N | -10.92059100 | 3.51988400  | -0.77074500 |
| C | -14.26787700 | 2.53939200  | -1.03468200 |
| O | -14.42762600 | 3.62169200  | -1.57429800 |
| O | -15.36459600 | 1.82569900  | -0.59117200 |
| H | 2.48119600   | 2.73153800  | 1.49623800  |
| H | 2.84070000   | 5.16436500  | 1.50920800  |

|   |              |              |             |
|---|--------------|--------------|-------------|
| H | 5.82903700   | 4.73490600   | -1.53994200 |
| H | 5.47184900   | 2.30275600   | -1.54512900 |
| H | 2.92410100   | -1.22294400  | 1.31427400  |
| H | 0.64310800   | -2.12375000  | 1.38764900  |
| H | -0.67471400  | 1.01289100   | -1.23310000 |
| H | 1.60170300   | 1.92119600   | -1.28709900 |
| H | 6.03680000   | 1.22631400   | 1.31339300  |
| H | 7.98034100   | -0.27621600  | 1.24649100  |
| H | 5.92084100   | -2.81451300  | -1.53188400 |
| H | 3.97730200   | -1.30977500  | -1.46355000 |
| H | 2.50472100   | 7.12742600   | 0.31109200  |
| H | 7.07551100   | 8.93258200   | -0.34835200 |
| H | 6.70908100   | 6.48014900   | -0.33156500 |
| H | 0.93095600   | 11.58829400  | 0.69345800  |
| H | 1.29291200   | 14.07423500  | 0.69199000  |
| H | 3.63074900   | 14.94818100  | 0.33984900  |
| H | 5.49409000   | 13.32322300  | 0.00506400  |
| H | 9.73131300   | -0.97909100  | -0.05433600 |
| H | 11.69180700  | -2.49906200  | -0.09773600 |
| H | 7.11724600   | -4.39522500  | -0.32671600 |
| H | 13.37622100  | -6.95391000  | -0.38633500 |
| H | 13.04813500  | -9.43770600  | -0.58213800 |
| H | 10.69472400  | -10.33142900 | -0.71028400 |
| H | 8.78429500   | -8.72893600  | -0.63925600 |
| H | -1.20958800  | -3.27476600  | 0.55939600  |
| H | -8.04894000  | -3.81158800  | 0.28722100  |
| H | -10.30385100 | -3.35990800  | -0.49551000 |
| H | -12.62259700 | -2.21600300  | -0.74929000 |

|   |              |             |             |
|---|--------------|-------------|-------------|
| H | -13.73631600 | -0.02783300 | -0.88601500 |
| H | -3.31080800  | -6.47375200 | 1.93654300  |
| H | -3.36642800  | -7.34072500 | 4.24248400  |
| H | -4.77141300  | -6.23020700 | 5.95912300  |
| H | -6.11841900  | -4.23727200 | 5.35238600  |
| H | -6.06239900  | -3.35832500 | 3.04842900  |
| H | -3.09265100  | -4.32807300 | -2.01096800 |
| H | -2.85661400  | -6.08696800 | -3.72443600 |
| H | -3.97886400  | -8.27875000 | -3.42354400 |
| H | -5.33896000  | -8.70161500 | -1.39243400 |
| H | -5.57269000  | -6.95329700 | 0.32828700  |
| H | -15.15355700 | 1.15977200  | 0.08878200  |

#### **WLK-4**

|   |             |             |             |
|---|-------------|-------------|-------------|
| N | -3.18079000 | 0.41304300  | -0.00276300 |
| C | -1.85674500 | -0.08547600 | -0.02531300 |
| C | -4.28893500 | -0.48038800 | -0.01277200 |
| C | -3.41769100 | 1.81873400  | 0.03180600  |
| C | -2.69923300 | 2.68450400  | -0.79993900 |
| C | -2.93441000 | 4.05250200  | -0.76034000 |
| C | -3.89941000 | 4.60087200  | 0.09633500  |
| C | -4.61913800 | 3.72188100  | 0.91750600  |
| C | -4.38034100 | 2.35373800  | 0.89385100  |
| C | -1.53769900 | -1.24174700 | -0.75287600 |
| C | -0.23960200 | -1.72652800 | -0.77403900 |
| C | 0.79109900  | -1.07983000 | -0.07286800 |
| C | 0.46509400  | 0.08088400  | 0.64432900  |

|   |              |             |             |
|---|--------------|-------------|-------------|
| C | -0.83228000  | 0.56910300  | 0.67298200  |
| C | -5.41135700  | -0.20819600 | -0.80282900 |
| C | -6.49915400  | -1.07141100 | -0.79946200 |
| C | -6.49876200  | -2.23930200 | -0.02467500 |
| C | -5.36713000  | -2.50428600 | 0.75891700  |
| C | -4.28216300  | -1.63814000 | 0.77419600  |
| C | -4.14625400  | 6.06090800  | 0.13343800  |
| C | -7.65568700  | -3.16506400 | -0.03436900 |
| C | -3.11226700  | 6.96897400  | -0.03367900 |
| C | -3.35429400  | 8.35113100  | 0.00002700  |
| C | -4.65696500  | 8.84655900  | 0.21081600  |
| C | -5.70580000  | 7.92148200  | 0.38130700  |
| C | -5.45433700  | 6.56914500  | 0.34159800  |
| C | -2.25340100  | 9.27180800  | -0.17471300 |
| N | -2.61694300  | 10.65280200 | -0.11661600 |
| C | -3.95188300  | 11.05035500 | 0.09529100  |
| N | -4.93566400  | 10.19615800 | 0.25325700  |
| C | -1.59792900  | 11.58695000 | -0.27886100 |
| C | -1.85517200  | 12.91271600 | -0.23906000 |
| C | -3.19827700  | 13.36471700 | -0.02660000 |
| C | -4.19978100  | 12.46360600 | 0.13306600  |
| O | -1.06588700  | 8.95614600  | -0.36457800 |
| C | -8.97658800  | -2.65922500 | -0.14635500 |
| C | -10.05780000 | -3.51051700 | -0.15697000 |
| C | -9.86612400  | -4.89954200 | -0.05388400 |
| C | -8.56126700  | -5.42089200 | 0.06167800  |
| C | -7.46918800  | -4.53549800 | 0.06665300  |
| C | -11.00333600 | -5.78790100 | -0.06428100 |

|   |              |             |             |
|---|--------------|-------------|-------------|
| N | -10.67442100 | -7.17615100 | 0.04521500  |
| C | -9.33670200  | -7.60392300 | 0.15296200  |
| N | -8.31846600  | -6.77668400 | 0.16184300  |
| C | -11.72957500 | -8.08284400 | 0.03959100  |
| C | -11.50723200 | -9.41202700 | 0.13767400  |
| C | -10.16282900 | -9.89513700 | 0.24905300  |
| C | -9.12585800  | -9.02052800 | 0.25563800  |
| O | -12.19511000 | -5.44549800 | -0.15797900 |
| C | 2.14709200   | -1.61601700 | -0.09920100 |
| C | 2.56141700   | -2.90487900 | -0.32658300 |
| C | 3.96726700   | -3.04648800 | -0.28936400 |
| C | 4.65556700   | -1.88898300 | -0.03033400 |
| S | 3.57114800   | -0.51099900 | 0.17519700  |
| C | 4.95254400   | -4.18205000 | -0.44163400 |
| C | 6.28781400   | -3.50664300 | -0.23368500 |
| C | 6.07550200   | -2.17004600 | 0.00520900  |
| C | 7.64146500   | -3.89650600 | -0.23980800 |
| C | 8.49944300   | -2.84879500 | 0.00675200  |
| S | 7.58322200   | -1.29271400 | 0.25326900  |
| C | 9.93313800   | -2.88524100 | 0.09046600  |
| C | 10.73540000  | -3.99603700 | 0.22287000  |
| C | 12.11518600  | -3.70028900 | 0.25980700  |
| C | 12.42346200  | -2.36017000 | 0.16730800  |
| S | 10.91466700  | -1.38520900 | 0.00299500  |
| C | 13.75022200  | -1.83435200 | 0.20712000  |
| C | 14.20413700  | -0.55679500 | 0.10730200  |
| F | 4.72694700   | -5.21125200 | 0.48735800  |
| F | 4.86216200   | -4.80461400 | -1.69704700 |

|   |              |             |             |
|---|--------------|-------------|-------------|
| C | 13.35151000  | 0.56232800  | -0.11229100 |
| N | 12.65281300  | 1.48159400  | -0.28362000 |
| C | 15.66294900  | -0.25627200 | 0.12471500  |
| O | 16.16450800  | 0.70319200  | -0.43659400 |
| O | 16.46422800  | -1.15327900 | 0.80197500  |
| H | -1.96352400  | 2.27969900  | -1.48434400 |
| H | -2.38370000  | 4.70297900  | -1.43015000 |
| H | -5.35132500  | 4.11620700  | 1.61306300  |
| H | -4.93297600  | 1.69345900  | 1.55119500  |
| H | -2.31091600  | -1.74878900 | -1.31588600 |
| H | -0.01359300  | -2.60187000 | -1.37188000 |
| H | 1.23095200   | 0.59475400  | 1.21482400  |
| H | -1.06048300  | 1.45743400  | 1.24790300  |
| H | -5.42267600  | 0.67827700  | -1.42501800 |
| H | -7.34730800  | -0.85240700 | -1.43799600 |
| H | -5.35159400  | -3.38276800 | 1.39370800  |
| H | -3.42789900  | -1.84976900 | 1.40562400  |
| H | -2.08987100  | 6.63841200  | -0.17201200 |
| H | -6.70340200  | 8.31352700  | 0.53181800  |
| H | -6.27760500  | 5.87203500  | 0.44920200  |
| H | -0.62483000  | 11.14498500 | -0.43295200 |
| H | -1.04788000  | 13.62036500 | -0.36751700 |
| H | -3.40643200  | 14.42720000 | 0.00536100  |
| H | -5.22941400  | 12.74886300 | 0.29615100  |
| H | -9.13267800  | -1.58857600 | -0.19716800 |
| H | -11.07153400 | -3.13658500 | -0.23400100 |
| H | -6.48001300  | -4.97068800 | 0.12663500  |
| H | -12.70010800 | -7.61764600 | -0.04844600 |



|   |              |              |             |
|---|--------------|--------------|-------------|
| H | -12.34249000 | -10.09851300 | 0.13126800  |
| H | -9.98193900  | -10.96024100 | 0.32754000  |
| H | -8.09362100  | -9.33027200  | 0.33710900  |
| H | 1.87143100   | -3.72117100  | -0.48710700 |
| H | 7.98585400   | -4.90275500  | -0.43451500 |
| H | 10.33913600  | -4.99789100  | 0.31182700  |
| H | 12.88144300  | -4.45871100  | 0.36323700  |
| H | 14.50780100  | -2.60929300  | 0.30303800  |
| H | 15.99073200  | -1.68412200  | 1.46862900  |

#### **WLK-5**

|   |             |             |             |
|---|-------------|-------------|-------------|
| N | 1.98526900  | 0.26043100  | -0.00706400 |
| C | 0.63068500  | -0.14844700 | -0.03155900 |
| C | 3.03098300  | -0.70452000 | -0.01897900 |
| C | 2.31677200  | 1.64702000  | 0.02659000  |
| C | 1.65920700  | 2.55897400  | -0.80606600 |
| C | 1.98810900  | 3.90754500  | -0.76837800 |
| C | 2.98883000  | 4.38940800  | 0.08729100  |
| C | 3.64604300  | 3.46424200  | 0.91014300  |
| C | 3.31362700  | 2.11578500  | 0.88826900  |
| C | 0.23742600  | -1.28275800 | -0.75664400 |
| C | -1.09021300 | -1.67919000 | -0.77403000 |
| C | -2.08174200 | -0.96190300 | -0.08419100 |

|   |             |             |             |
|---|-------------|-------------|-------------|
| C | -1.68116300 | 0.18436700  | 0.62062000  |
| C | -0.35148200 | 0.57771900  | 0.65566300  |
| C | 4.16989100  | -0.50640700 | -0.80775400 |
| C | 5.19755500  | -1.44034900 | -0.80590500 |
| C | 5.11883500  | -2.60734000 | -0.03374500 |
| C | 3.97155500  | -2.79768900 | 0.74884400  |
| C | 2.94684800  | -1.86115100 | 0.76543500  |
| C | 3.33642300  | 5.82886800  | 0.12191300  |
| C | 6.21135700  | -3.60813800 | -0.04488600 |
| C | 2.36859600  | 6.80663900  | -0.04866800 |
| C | 2.70656900  | 8.16861000  | -0.01705400 |
| C | 4.04029400  | 8.57229400  | 0.19533200  |
| C | 5.02168500  | 7.57663100  | 0.36909900  |
| C | 4.67644200  | 6.24508500  | 0.33120900  |
| C | 1.67309500  | 9.16373300  | -0.19570300 |
| N | 2.13208900  | 10.51614900 | -0.13817600 |
| C | 3.49114700  | 10.81981900 | 0.07567400  |
| N | 4.41257300  | 9.89928100  | 0.23627900  |
| C | 1.18103600  | 11.51893700 | -0.30303800 |
| C | 1.53005100  | 12.82357600 | -0.26413000 |
| C | 2.90111000  | 13.18103800 | -0.04990700 |
| C | 3.83701100  | 12.21242900 | 0.11235500  |
| O | 0.46694000  | 8.93178700  | -0.38849000 |
| C | 7.56311000  | -3.19137800 | -0.15577000 |
| C | 8.58518900  | -4.11279900 | -0.16763800 |
| C | 8.30140900  | -5.48615200 | -0.06695700 |
| C | 6.96464700  | -5.91958800 | 0.04740500  |
| C | 5.93409300  | -4.96340300 | 0.05370100  |

|   |              |              |             |
|---|--------------|--------------|-------------|
| C | 9.37694900   | -6.44815800  | -0.07853400 |
| N | 8.95629700   | -7.81170600  | 0.02887800  |
| C | 7.59303800   | -8.14964300  | 0.13529100  |
| N | 6.63204900   | -7.25655600  | 0.14502000  |
| C | 9.94884400   | -8.78647500  | 0.02248900  |
| C | 9.63868500   | -10.09811400 | 0.11839100  |
| C | 8.26506900   | -10.49092600 | 0.22826500  |
| C | 7.28853200   | -9.54932100  | 0.23561600  |
| O | 10.58888900  | -6.18588100  | -0.17159600 |
| C | -3.47688400  | -1.43673400  | -0.09572200 |
| C | -3.78493700  | -2.77060400  | -0.19413600 |
| C | -5.11664600  | -3.27493900  | -0.23557100 |
| C | -6.23221100  | -2.47626600  | -0.17882800 |
| C | -5.97684500  | -1.06202100  | -0.05790600 |
| C | -4.61103200  | -0.54230300  | -0.01222200 |
| N | -6.92839800  | -0.15126400  | 0.01834300  |
| S | -6.15594100  | 1.42076400   | 0.14965800  |
| N | -4.52435900  | 0.77331100   | 0.09610200  |
| C | -7.57806200  | -3.03186600  | -0.23015000 |
| C | -7.91261000  | -4.35055600  | -0.44940700 |
| C | -9.29745000  | -4.61105100  | -0.41961800 |
| C | -10.07874500 | -3.50205000  | -0.17822800 |
| S | -9.05368900  | -2.03533000  | 0.01887400  |
| C | -11.50648700 | -3.53355300  | -0.11896600 |
| C | -12.40980200 | -2.55057500  | 0.13772800  |
| C | -12.04801600 | -1.21144700  | 0.46038400  |
| N | -11.76434500 | -0.10916100  | 0.71887800  |
| C | -13.86854100 | -2.84734600  | 0.19467500  |

|   |              |              |             |
|---|--------------|--------------|-------------|
| O | -14.66369400 | -2.22213800  | 0.87619800  |
| O | -14.30490900 | -3.91684000  | -0.56187500 |
| H | 0.89565400   | 2.20521600   | -1.48815800 |
| H | 1.48262500   | 4.59342200   | -1.43850000 |
| H | 4.40320800   | 3.80821700   | 1.60568200  |
| H | 3.81909300   | 1.42008600   | 1.54705500  |
| H | 0.97506800   | -1.84049300  | -1.31951600 |
| H | -1.36845700  | -2.53864600  | -1.37329100 |
| H | -2.41888200  | 0.77044000   | 1.14954200  |
| H | -0.06758500  | 1.45450400   | 1.22357300  |
| H | 4.24095800   | 0.37879000   | -1.42775700 |
| H | 6.05883100   | -1.27694400  | -1.44355900 |
| H | 3.89742400   | -3.67418200  | 1.38231700  |
| H | 2.08003400   | -2.01600900  | 1.39614800  |
| H | 1.32582600   | 6.54793800   | -0.18799100 |
| H | 6.04397400   | 7.89833600   | 0.52076900  |
| H | 5.44887400   | 5.49242600   | 0.44142800  |
| H | 0.17972000   | 11.14571800  | -0.45821900 |
| H | 0.77426900   | 13.58568000  | -0.39445800 |
| H | 3.18282000   | 14.22645300  | -0.01860300 |
| H | 4.88377000   | 12.42530300  | 0.27697100  |
| H | 7.79019800   | -2.13343200  | -0.20458700 |
| H | 9.62160300   | -3.80707000  | -0.24373100 |
| H | 4.91805500   | -5.33164400  | 0.11291800  |
| H | 10.94819800  | -8.38662200  | -0.06424400 |
| H | 10.42649800  | -10.83855600 | 0.11152900  |
| H | 8.01377100   | -11.54177600 | 0.30513400  |
| H | 6.23796500   | -9.78993900  | 0.31623100  |

|   |              |             |             |
|---|--------------|-------------|-------------|
| H | -2.97976100  | -3.49401400 | -0.21637600 |
| H | -5.23322800  | -4.34920300 | -0.30043500 |
| H | -7.18074600  | -5.12340900 | -0.63653100 |
| H | -9.72042300  | -5.59629900 | -0.57363500 |
| H | -11.91397300 | -4.52994300 | -0.27856400 |
| H | -13.70458400 | -4.15547600 | -1.29196500 |

### WLK-6

|   |             |             |             |
|---|-------------|-------------|-------------|
| N | 1.94081100  | 0.11400500  | -0.05249200 |
| C | 0.54636200  | -0.08147800 | -0.08395100 |
| C | 2.83538100  | -0.99639400 | -0.05788200 |
| C | 2.48880100  | 1.43217800  | -0.00981900 |
| C | 2.02862900  | 2.42496100  | -0.88084500 |
| C | 2.57247000  | 3.70198300  | -0.83817900 |
| C | 3.59791700  | 4.02623900  | 0.06158700  |
| C | 4.05663300  | 3.01910800  | 0.92193300  |
| C | 3.50909600  | 1.74270500  | 0.89370500  |
| C | -0.00963100 | -1.20119600 | -0.72970200 |
| C | -1.37772700 | -1.38740400 | -0.75787100 |
| C | -2.25604300 | -0.46936900 | -0.15126000 |
| C | -1.69521500 | 0.64888200  | 0.48861200  |
| C | -0.32297900 | 0.83789900  | 0.52383400  |
| C | 3.97131000  | -0.98228500 | -0.87355300 |
| C | 4.85646800  | -2.05243900 | -0.86274000 |
| C | 4.63081300  | -3.17357100 | -0.05261600 |

|   |            |             |             |
|---|------------|-------------|-------------|
| C | 3.48728600 | -3.17754300 | 0.75814700  |
| C | 2.60589300 | -2.10467500 | 0.76497300  |
| C | 4.17460100 | 5.39012800  | 0.10185600  |
| C | 5.57057500 | -4.31950100 | -0.05317500 |
| C | 3.38818600 | 6.50948700  | -0.12196700 |
| C | 3.94216100 | 7.79859900  | -0.08451000 |
| C | 5.31280600 | 7.98290300  | 0.18797600  |
| C | 6.10955700 | 6.84346100  | 0.41566000  |
| C | 5.55364800 | 5.58547900  | 0.37157600  |
| C | 3.09429000 | 8.94571900  | -0.31980200 |
| N | 3.76474900 | 10.20606100 | -0.25067600 |
| C | 5.14386800 | 10.28769100 | 0.02543100  |
| N | 5.89437600 | 9.23191000  | 0.23661800  |
| C | 2.99878900 | 11.34767000 | -0.46825600 |
| C | 3.55410300 | 12.57850900 | -0.42252200 |
| C | 4.95380200 | 12.71119800 | -0.14580900 |
| C | 5.71052000 | 11.60570200 | 0.06817600  |
| O | 1.87653500 | 8.90997500  | -0.56815200 |
| C | 6.96494900 | -4.10164600 | -0.19884400 |
| C | 7.84584400 | -5.15896100 | -0.20101600 |
| C | 7.37248600 | -6.47484300 | -0.05583800 |
| C | 5.99057600 | -6.71097900 | 0.09338000  |
| C | 5.10592200 | -5.61816200 | 0.08933100  |
| C | 8.30058800 | -7.58005400 | -0.05744100 |
| N | 7.69351300 | -8.86650000 | 0.09680000  |
| C | 6.29864400 | -9.00439500 | 0.23593200  |
| N | 5.47421300 | -7.98377200 | 0.23558100  |
| C | 8.53767400 | -9.97234700 | 0.10237200  |

|   |              |              |             |
|---|--------------|--------------|-------------|
| C | 8.04678200   | -11.22347800 | 0.24192400  |
| C | 6.63397300   | -11.41397400 | 0.38629700  |
| C | 5.80098600   | -10.34324800 | 0.38237300  |
| O | 9.53521800   | -7.49488700  | -0.17847100 |
| C | -3.69430200  | -0.72812000  | -0.22133600 |
| N | -4.09363000  | -1.82798400  | -0.83703600 |
| C | -5.41104300  | -2.17210200  | -0.96821200 |
| C | -6.48020700  | -1.44491900  | -0.50230000 |
| C | -6.12476300  | -0.23511900  | 0.18918900  |
| C | -4.72252200  | 0.13825900   | 0.33855300  |
| N | -6.99315500  | 0.60104700   | 0.72657800  |
| S | -6.08369700  | 1.91565000   | 1.45551600  |
| N | -4.51786900  | 1.26722500   | 0.99241900  |
| C | -7.85231200  | -1.88205300  | -0.69734200 |
| C | -8.27361200  | -2.97336800  | -1.42545700 |
| C | -9.66983600  | -3.16716800  | -1.42085900 |
| C | -10.37206500 | -2.23222100  | -0.69173500 |
| S | -9.25194800  | -1.02621200  | 0.03761900  |
| C | -11.79543200 | -2.22931700  | -0.56245800 |
| C | -12.62510900 | -1.40801400  | 0.13408600  |
| C | -12.16783100 | -0.34083000  | 0.95890300  |
| N | -11.80459500 | 0.54109700   | 1.63167600  |
| C | -14.09611600 | -1.64278100  | 0.15395900  |
| O | -14.82239800 | -1.32599000  | 1.08119900  |
| O | -14.62846300 | -2.28220600  | -0.94776800 |
| H | 1.25031500   | 2.18862600   | -1.59636500 |
| H | 2.21906100   | 4.45097300   | -1.53748400 |
| H | 4.82790400   | 3.24532300   | 1.64938200  |

|   |              |              |             |
|---|--------------|--------------|-------------|
| H | 3.86353300   | 0.98217700   | 1.57895800  |
| H | 0.64083400   | -1.91558000  | -1.21723000 |
| H | -1.80272400  | -2.24448400  | -1.26285700 |
| H | -2.34060800  | 1.36814500   | 0.97178700  |
| H | 0.08340400   | 1.70079000   | 1.03499600  |
| H | 4.15167800   | -0.13269500  | -1.52078400 |
| H | 5.71753100   | -2.03144300  | -1.52080900 |
| H | 3.30491300   | -4.01670800  | 1.41944600  |
| H | 1.74009200   | -2.11664400  | 1.41579300  |
| H | 2.32463100   | 6.42198000   | -0.30878100 |
| H | 7.16263000   | 6.99678500   | 0.61331400  |
| H | 6.18697000   | 4.71893600   | 0.52417000  |
| H | 1.95814400   | 11.14017800  | -0.66821200 |
| H | 2.93976200   | 13.45144400  | -0.59444600 |
| H | 5.40074800   | 13.69714100  | -0.10889200 |
| H | 6.76931700   | 11.64781300  | 0.28096500  |
| H | 7.33837500   | -3.08832200  | -0.28236000 |
| H | 8.91331100   | -5.00582500  | -0.30332900 |
| H | 4.04943100   | -5.83664800  | 0.17636200  |
| H | 9.58158600   | -9.72119500  | -0.01277900 |
| H | 8.72143000   | -12.06834600 | 0.24359800  |
| H | 6.23800000   | -12.41597500 | 0.49817900  |
| H | 4.72882400   | -10.42975200 | 0.48759400  |
| H | -5.56851000  | -3.10846700  | -1.48671900 |
| H | -7.59770700  | -3.62437500  | -1.96140300 |
| H | -10.15839400 | -3.97958300  | -1.94481300 |
| H | -12.26950600 | -3.05115000  | -1.09542400 |
| H | -14.07455500 | -2.21972700  | -1.74754600 |





## References:

1. Y. Gao, S. Dai, J. Zhu, L. Wu, L. Han, Y. Li, Q. Ye and Y. Cui, *J. Photochem. Photobiol., A*, 2023, **438**, 114563.
